# Supplementary material for: CEP–CEPR1 signalling inhibits the sucrose-dependent enhancement of lateral root growth
Source: PubMed Central journal article supplement — J Exp Bot. 2019 May 6;70(15):3955–67. doi: 10.1093/jxb/erz207 (PMC6685651; doi:10.1093/jxb/erz207), 2019-05-06
Supplement: erz207_suppl_supplementary_file-1.pdf [file erz207_suppl_supplementary_file-1.pdf]

## Supplementary figures

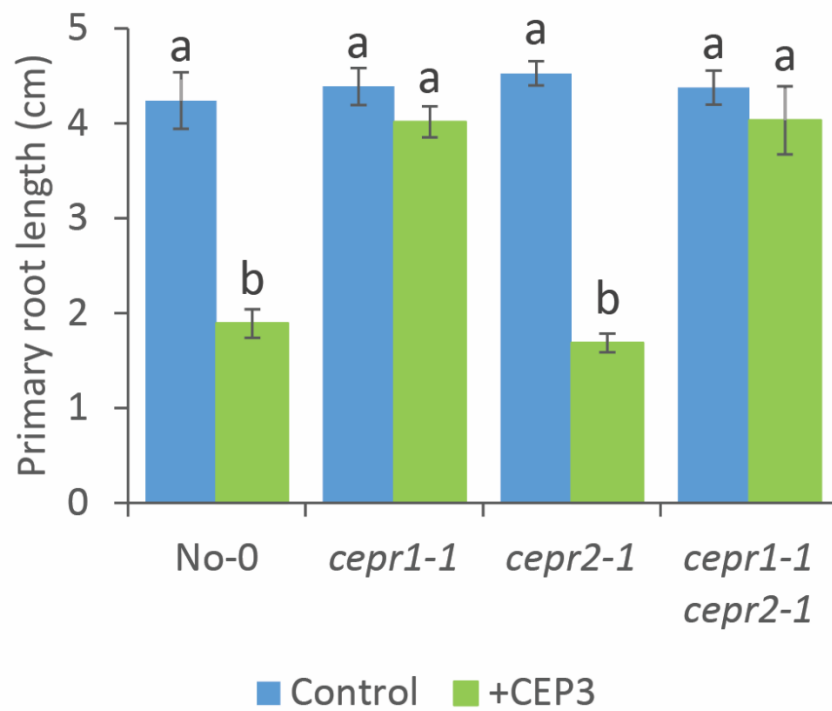

**Figure S1. Loss of CEPR1 is sufficient to confer insensitivity to CEP peptide addition.**

Primary root length of 12 day old seedlings grown in the presence or absence of 1 $\mu$ M CEP3 (n $\geq$ 6). Different letters indicate a statistically significant difference (P $\leq$ 0.05, Two-way ANOVA followed by Bonferroni multiple comparisons test).

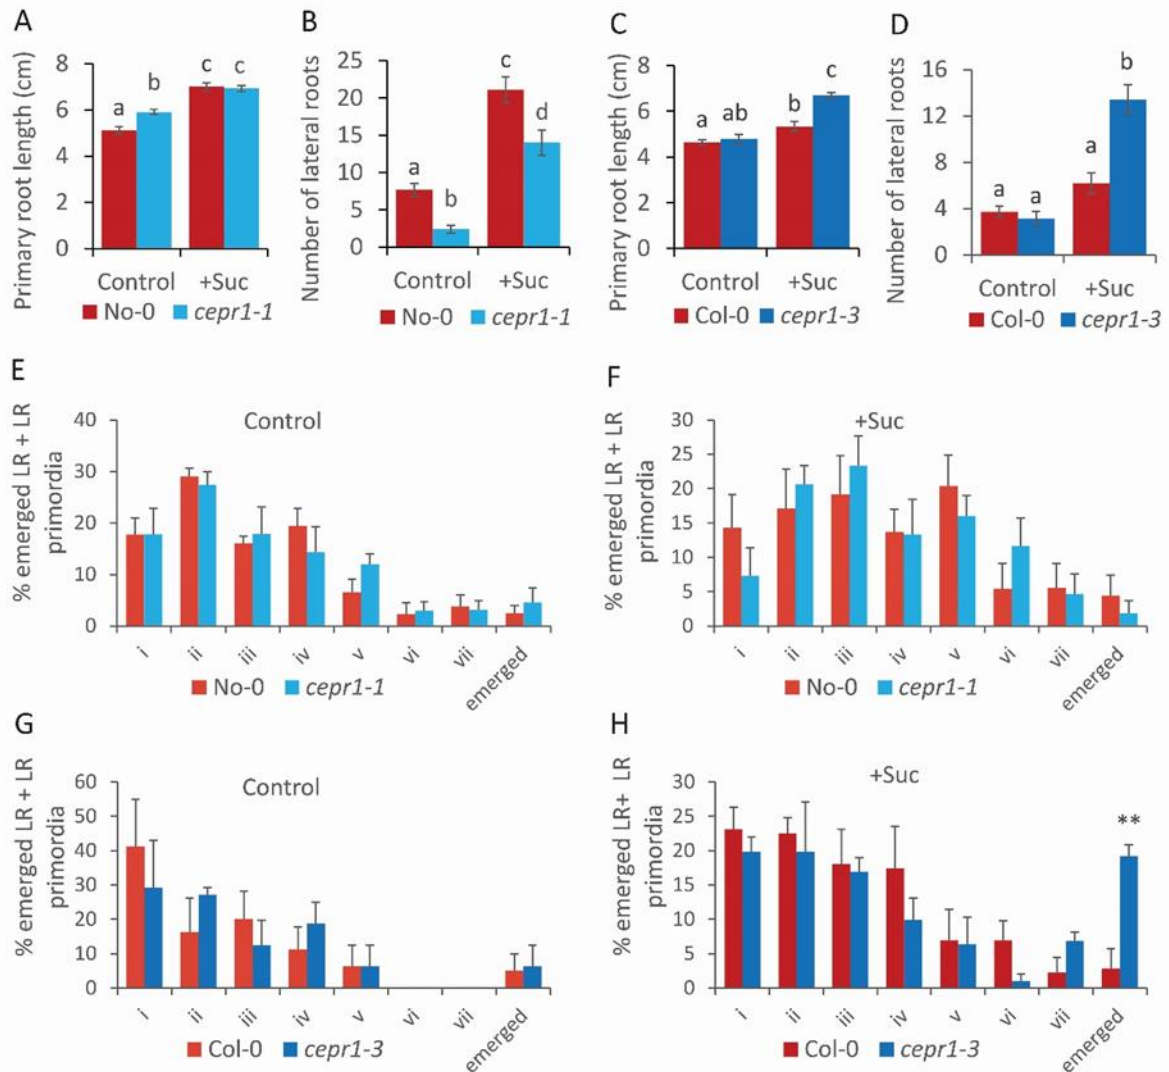

**Figure S2. Effect of CEPR1 on primary root length, LR number and LR primordia**

(A-D) Effect of sucrose addition on primary root length (A, C) and emerged LR number (B, D) in the No-0 (A, B) and Col-0 (C, D) backgrounds for seedlings grown for 12 days on medium with or without 1% suc ( $n \geq 7$ ). Different letters indicate a statistically significant difference ( $P \leq 0.05$ , two-way ANOVA followed by Bonferroni multiple comparisons test) ( $n \geq 7$ ). (E-H) Effect of sucrose addition on LR developmental staging in WT and *cepr1*. Percentage of emerged LRs + LR primordia at each stage of development for 7 day old seedlings in the No-0 (E, F) and Col-0 (G, H) background grown on medium lacking sucrose (E, G) or with 1% w/v sucrose (F, H) ( $n \geq 4$ ). For E-H, statistically significant differences between WT and *cepr1* were determined using a Student's t-test: \*,  $P \leq 0.05$ ; \*\*,  $P \leq 0.01$ ; \*\*\*,  $P \leq 0.001$ . Bars indicate SE.
